# Supplementary material
Source: PubMed Central journal article supplement (PMC2773144)
Supplement: NIHMS133661-supplement-sup1.pdf [file NIHMS133661-supplement-sup1.pdf]

**Supplemental Table 1: Demographics of control subjects**

| <b>Subject</b> | <b>Sex</b> | <b>Age</b> | <b>Handedness</b> | <b>IQ<sup>1</sup></b> |
|----------------|------------|------------|-------------------|-----------------------|
| 01             | M          | 10.50      | R                 | 100                   |
| 02             | M          | 10.25      | R                 | 103                   |
| 03             | M          | 8.58       | R                 | 97                    |
| 04             | M          | 13.59      | R                 | 100                   |
| 05             | M          | 14.30      | R                 | 80                    |
| 06             | M          | 11.00      | R                 | 120                   |
| 07             | M          | 11.10      | R                 | 107                   |
| 08             | M          | 15.33      | R                 | 100                   |
| 09             | M          | 8.80       | R                 | 112                   |
| 10             | M          | 7.70       | R                 | 91                    |
| 11             | M          | 13.00      | R                 | 101                   |
| 12             | M          | 13.66      | R                 | 118                   |
| 13             | M          | 10.80      | L                 | 116                   |
| 14             | M          | 9.58       | R                 | 106                   |
| 15             | M          | 10.50      | R                 | 105                   |
| 16             | M          | 16.08      | L                 | 108                   |
| 17             | M          | 8.66       | R                 | 108                   |
| 18             | M          | 12.33      | R                 | 95                    |
| 19             | M          | 16.00      | R                 | 116                   |

Sex: M = male; Age: in years; Handedness: R = right-handed / L = left-handed

<sup>1</sup>Intelligence quotient (IQ) estimated using the Block Design and Vocabulary subtests of the Wechsler Intelligence Scale for Children, Third Edition (WISC-III, 1991).
