# Supplementary material
Source: PubMed Central journal article supplement (PMC2773144)
Supplement: NIHMS133661-supplement-sup2.pdf [file NIHMS133661-supplement-sup2.pdf]

**Supplemental Table 2: Demographics and clinical data of ADHD subjects**

| Subject | Sex | Age   | Hand | IQ <sup>1</sup> | ADHD Subtype (Severity) <sup>2</sup> | ODD | Other Conditions                  | Medication           |
|---------|-----|-------|------|-----------------|--------------------------------------|-----|-----------------------------------|----------------------|
| 01      | M   | 11.16 | R    | 88              | Combined Type (I: 9; H: 6)           | yes | no                                | no medication        |
| 02      | M   | 8.83  | L    | 117             | Combined Type (I: 9; H: 6)           | yes | Separation Anxiety                | no medication        |
| 03      | M   | 13.16 | R    | 83              | Combined Type (I: 9; H: 6)           | no  | no                                | no medication        |
| 04      | M   | 7.91  | R    | 94              | Combined Type (I: 9; H: 6)           | yes | no                                | no medication        |
| 05      | M   | 10.75 | R    | 85              | Inattentive Type (I: 9; H:4)         | no  | Learning Disability               | Concerta (18 mg)     |
| 06      | M   | 13.58 | R    | 88              | Combined Type (I: 9; H: 8)           | yes | Learning Disability, Enuresis     | no medication        |
| 07      | M   | 11.33 | R    | 74              | Combined Type (I: 9; H: 8)           | yes | no                                | Ritalin (2.5 / 5 mg) |
| 08      | M   | 7.16  | R    | 74              | Combined Type (I: 7; H: 8)           | yes | no                                | Ritalin (10 mg)      |
| 09      | M   | 10.25 | R    | 91              | Combined Type (I: 9; H: 9)           | yes | no                                | no medication        |
| 10      | M   | 14.16 | R    | 77              | Inattentive Type (I: 9; H: 0)        | no  | no                                | no medication        |
| 11      | M   | 11.33 | R    | 97              | Combined Type (I: 8; H: 9)           | yes | Specific Phobia, Trichotillomania | Dexidrine (20 mg)    |
| 12      | M   | 9.83  | R    | 94              | Inattentive Type (I: 7; H:5)         | no  | no                                | no medication        |
| 13      | M   | 9.80  | R    | 85              | Combined Type (I: 8; H: 6)           | yes | no                                | no medication        |
| 14      | M   | 16.00 | R    | 100             | Inattentive Type (I: 7; H: 0)        | no  | Learning Disability               | Concerta (12 mg)     |
| 15      | M   | 15.99 | R    | 77              | Inattentive Type (I: 8; H:4)         | no  | no                                | no medication        |
| 16      | M   | 10.68 | R    | 123             | Combined Type (I: 8; H: 8)           | no  | no                                | Adderall (15 mg)     |
| 17      | M   | 12.90 | R    | 109             | Inattentive Type (I: 9; H:1)         | yes | Motor Tic                         | Strattera (20 mg)    |
| 18      | M   | 16.20 | R    | 103             | Combined Type (I: 9; H: 9)           | no  | no                                | no medication        |
| 19      | M   | 12.91 | R    | 91              | Not available (n/a)                  | n/a | n/a                               | n/a                  |

Sex: M = male; Age: in years; Hand = Handedness: R = right-handed / L = left-handed; ODD: yes = Subjects were co-morbid for oppositional defiant disorder.

<sup>1</sup>Intelligence quotient (IQ) estimated using the Block Design and Vocabulary subtests of the WISC-III.

<sup>2</sup>The first value indicates the score obtained on the Inattentive (I) subscale; the second value indicates the score obtained on the Hyperactive-Impulsive (H) subscale, using the SNAP-IV.
