# Supplementary material
Source: PubMed Central journal article supplement (PMC2773144)
Supplement: NIHMS133661-supplement-sup3.pdf [file NIHMS133661-supplement-sup3.pdf]

**Supplemental Figure 1**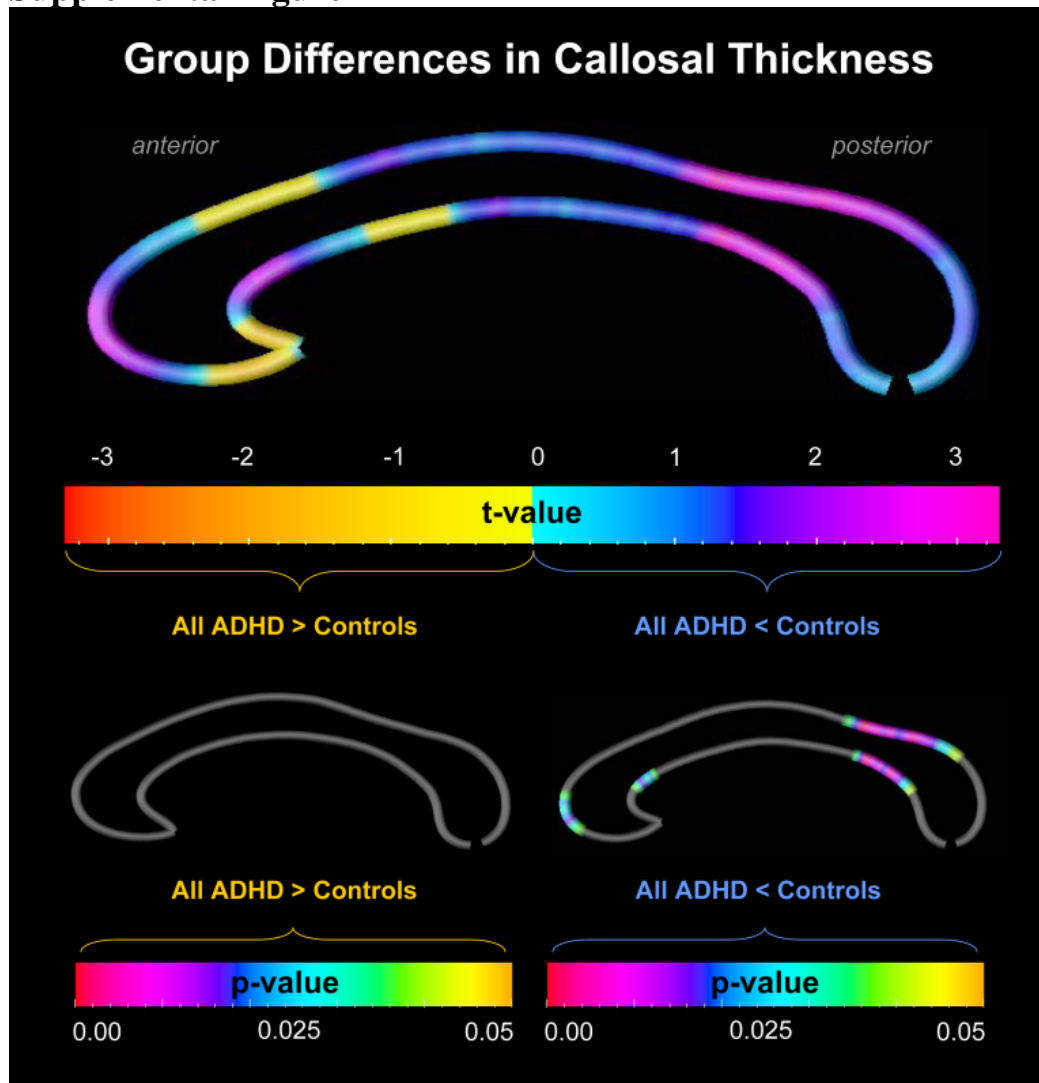

**Supplemental Figure 1:** Group differences in callosal thickness. The top panel shows the t-values for comparisons of distance values performed between groups at each surface point. Warmer colors indicate negative t-values (regions that are larger in ADHD subjects; All ADHD > Controls) and cooler colors indicate positive t-values (regions that are smaller in ADHD subjects; All ADHD < Controls). The bottom panel illustrates the respective p-maps for these comparisons where positive and negative effects are mapped separately (left: All ADHD > Controls; right: All ADHD < Controls), with gray indicating regions that did not show significant differences in callosal thickness between groups ( $p > 0.05$ ).

## Supplemental Figure 2

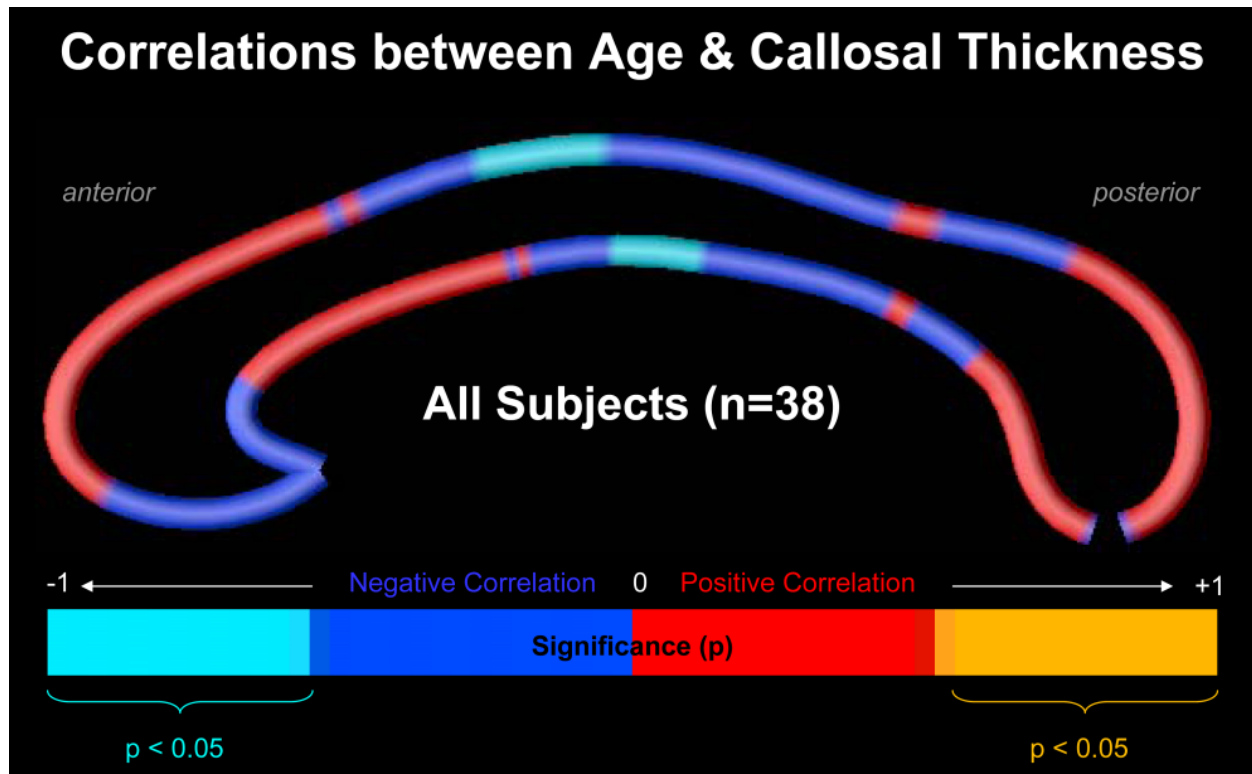

**Supplemental Figure 2:** Correlations between age and callosal thickness. The callosal map depicts uncorrected significance ( $p$ ) values with warmer colors indicating positive correlations and cooler colors indicating negative correlations. Shown are correlations within the combined sample ( $n=38$ ). There were no differences between ADHD and control subjects with respect to the relationship between age and callosal thickness.
